# Supplementary material for: Engineering budding yeast for the de novo synthesis of valuable flavanone derivatives
Source: Royal Society of Chemistry journal article supplement (doi:10.1039/d4gc05241b), 2025-01-01
Supplement: d4gc05241b1.pdf [file d4gc05241b1.pdf]

**Supplementary material**

**Engineering budding yeast for the *de novo* synthesis of  
valuable flavanone derivatives**

**Si-Yu Zhu<sup>a,b</sup>, Na Li<sup>a,b</sup>, Zhi-Hua Liu<sup>a,b,\*</sup>, Ying-Jin Yuan<sup>a,b</sup>, Bing-Zhi Li<sup>a,b,\*</sup>**

<sup>a</sup> Frontiers Science Center for Synthetic Biology and Key Laboratory of Systems Bioengineering (Ministry of Education), School of Chemical Engineering and Technology, Tianjin University, Tianjin 300072, China.

<sup>b</sup> Frontiers Research Institute for Synthetic Biology, Tianjin University, Tianjin 301799, China.

\*Corresponding authors: bzli@tju.edu.cn (B.Z. Li), zhliu@tju.edu.cn (Z.H. Liu)

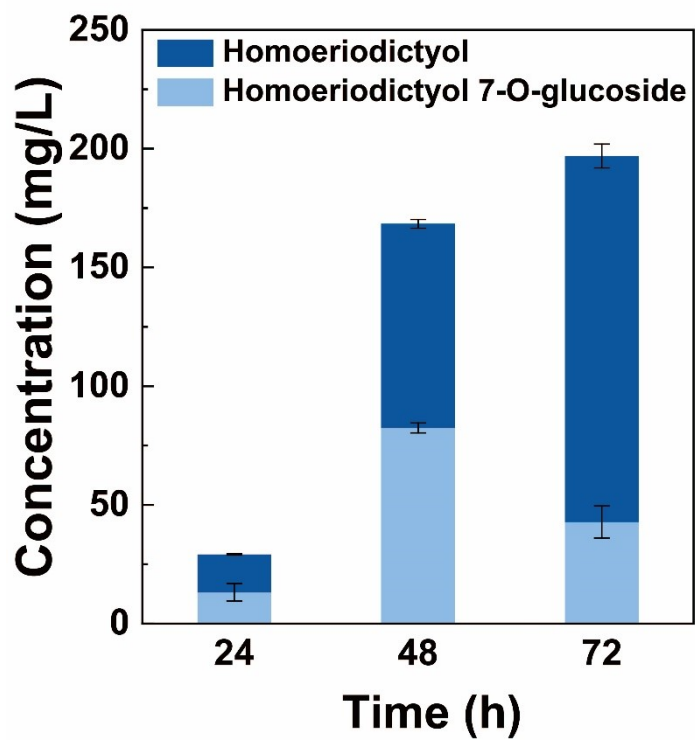

**Figure S1** The production of homoeriodictyol 7-O-glucoside and homoeriodictyol by strain YTP008 expressing UGT73C6.

**Table S1 List of plasmids constructed in this study**

| Strains | Description                                              |
|---------|----------------------------------------------------------|
| pRS101  | pRS413- <i>P<sub>TEF1</sub>-DicGT4-T<sub>ADHI</sub></i>  |
| pRS102  | pRS413- <i>P<sub>TEF1</sub>-AtGT2-T<sub>ADHI</sub></i>   |
| pRS103  | pRS413- <i>P<sub>TEF1</sub>-NtGT2-T<sub>ADHI</sub></i>   |
| pRS104  | pRS413- <i>P<sub>TEF1</sub>-UGT73C6-T<sub>ADHI</sub></i> |
| pRS105  | pRS413- <i>P<sub>TEF1</sub>-UGT73B2-T<sub>ADHI</sub></i> |

**Table S2 List of strains constructed in this study**

| Strains | Description                                                                                                                                                                                                                                                                                                                                                                                |
|---------|--------------------------------------------------------------------------------------------------------------------------------------------------------------------------------------------------------------------------------------------------------------------------------------------------------------------------------------------------------------------------------------------|
| Yeri001 | CEN.PK2-1D, <i>YPRCdelta15::P<sub>TPH1</sub>-Pc4CL-T<sub>CPS1</sub>-P<sub>GPM1</sub>-MsCHI-T<sub>TEF2</sub>-P<sub>TEF1</sub>-PhCHS-T<sub>ADH1</sub>, ΔP<sub>ACCI</sub>::P<sub>TEF1</sub>, ΔCIT2, ΔFDC1, ΔTSC13::MdECR, Ty3::P<sub>TEF1</sub>-MsCHI-(GGGG)1-PhCHS-T<sub>ADH1</sub>, <i>YORWdelta22::P<sub>GPM1</sub>-ATRI-T<sub>TEF2</sub>-P<sub>TEF1</sub>-AtF3'H-T<sub>ADH1</sub></i></i> |
| YTAL001 | Yeri001, PDC5::P <sub>TEF1</sub> -FjTAL-T <sub>ADH1</sub>                                                                                                                                                                                                                                                                                                                                  |
| YTP001  | YTAL001, TT::P <sub>TEF1</sub> -AtPAL2-T <sub>ADH1</sub> -P <sub>GPM1</sub> -AtC4H-T <sub>TEF2</sub> -P <sub>TPH1</sub> -ATRI-T <sub>CPS1</sub> -P <sub>TDH3</sub> -CYB5-T <sub>PGK1</sub>                                                                                                                                                                                                 |
| YTP002  | YTP001, <i>YHRCdelta14::P<sub>TEF1</sub>-ARO4<sup>K229L</sup>-T<sub>ADH1</sub>-P<sub>GPM1</sub>-ARO7<sup>G141S</sup>-T<sub>TEF2</sub></i>                                                                                                                                                                                                                                                  |
| YTP003  | YTP002, <i>YORWdelta17::P<sub>TEF1</sub>-EcaroL-T<sub>ADH1</sub></i>                                                                                                                                                                                                                                                                                                                       |
| YTP004  | YTP002, <i>YORWdelta17::P<sub>TEF1</sub>-EcaroL-T<sub>ADH1</sub>-P<sub>GPM1</sub>-MtPDH1-T<sub>TEF2</sub></i>                                                                                                                                                                                                                                                                              |
| YTP005  | YTP004, <i>ARO10::P<sub>TEF1</sub>-SeACS<sup>L641S</sup>-T<sub>ADH1</sub></i>                                                                                                                                                                                                                                                                                                              |
| YTP006  | YTP004, <i>ARO10::P<sub>TEF1</sub>-SeACS<sup>L641S</sup>-T<sub>ADH1</sub>-P<sub>GPM1</sub>-ACCI<sup>S659A/S1157A</sup>-T<sub>TEF2</sub></i>                                                                                                                                                                                                                                                |
| YTP007  | YTP004, <i>ARO10::P<sub>TPH1</sub>-ROMT-9<sup>mut</sup>-T<sub>CPS1</sub></i>                                                                                                                                                                                                                                                                                                               |
| YTP008  | YTP007, <i>YNRCdelta9::P<sub>TPH1</sub>-MET6-T<sub>CPS1</sub>-P<sub>GPM1</sub>-SAH1-T<sub>TEF2</sub>-P<sub>TEF1</sub>-ADO1-T<sub>ADH1</sub>-P<sub>TDH3</sub>-MET13-MTHFR-T<sub>CYC1</sub></i>                                                                                                                                                                                              |
| YTP009  | YTP008, pRS101                                                                                                                                                                                                                                                                                                                                                                             |
| YTP010  | YTP008, pRS102                                                                                                                                                                                                                                                                                                                                                                             |
| YTP011  | YTP008, pRS103                                                                                                                                                                                                                                                                                                                                                                             |
| YTP012  | YTP008, pRS104                                                                                                                                                                                                                                                                                                                                                                             |
| YTP013  | YTP008, pRS105                                                                                                                                                                                                                                                                                                                                                                             |
| YHG001  | YTP008, <i>YERCdelta8::P<sub>TEF1</sub>-UGT73C6-T<sub>ADH1</sub></i>                                                                                                                                                                                                                                                                                                                       |
| YHG002  | YHG001, ΔGTB1                                                                                                                                                                                                                                                                                                                                                                              |
| YHG003  | YHG001, ΔEGH1                                                                                                                                                                                                                                                                                                                                                                              |
| YHG004  | YHG001, ΔSPR1                                                                                                                                                                                                                                                                                                                                                                              |
| YHG005  | YHG001, ΔEXG1                                                                                                                                                                                                                                                                                                                                                                              |
| YHG006  | YHG005, <i>HO::P<sub>TPH1</sub>-Pc4CL-T<sub>CPS1</sub>-P<sub>TEF1</sub>-ROMT-9<sup>mut</sup>-T<sub>ADH1</sub></i>                                                                                                                                                                                                                                                                          |
| YHG007  | YHG006, <i>YMRWdelta15::P<sub>TEF1</sub>-ZWF1-T<sub>ADH1</sub></i>                                                                                                                                                                                                                                                                                                                         |
| YHG008  | YHG006, <i>YMRWdelta15::P<sub>TEF1</sub>-TYR1-T<sub>ADH1</sub></i>                                                                                                                                                                                                                                                                                                                         |
| YHG009  | YHG006, <i>YMRWdelta15::P<sub>TEF1</sub>-BDH1<sup>mut</sup>-T<sub>ADH1</sub></i>                                                                                                                                                                                                                                                                                                           |
| YHG010  | YHG006, <i>YMRWdelta15::P<sub>TEF1</sub>-ALD6-T<sub>ADH1</sub></i>                                                                                                                                                                                                                                                                                                                         |
| YHG011  | YHG006, <i>YMRWdelta15::P<sub>TEF1</sub>-Pos5Δ17-T<sub>ADH1</sub></i>                                                                                                                                                                                                                                                                                                                      |
| YHG012  | YHG006, <i>YMRWdelta15::P<sub>TEF1</sub>-GND1-T<sub>ADH1</sub></i>                                                                                                                                                                                                                                                                                                                         |
| YHG013  | YHG006, <i>YMRWdelta15::P<sub>TEF1</sub>-GND1-T<sub>ADH1</sub>-P<sub>GPM1</sub>-Pos5Δ17-T<sub>TEF2</sub></i>                                                                                                                                                                                                                                                                               |
| YHG014  | YHG013, <i>YARCdelta8::P<sub>TEF1</sub>-PGM1-T<sub>ADH1</sub></i>                                                                                                                                                                                                                                                                                                                          |
| YHG015  | YHG013, <i>YARCdelta8::P<sub>TEF1</sub>-URA6-T<sub>ADH1</sub></i>                                                                                                                                                                                                                                                                                                                          |
| YHG016  | YHG013, <i>YARCdelta8::P<sub>TEF1</sub>-YNK1-T<sub>ADH1</sub></i>                                                                                                                                                                                                                                                                                                                          |
| YHG017  | YHG013, <i>YARCdelta8::P<sub>TEF1</sub>-UGPI-T<sub>ADH1</sub></i>                                                                                                                                                                                                                                                                                                                          |
| YHG018  | YHG013, <i>YARCdelta8::P<sub>TEF1</sub>-YMD8-T<sub>ADH1</sub></i>                                                                                                                                                                                                                                                                                                                          |
| YHG019  | YHG013, ΔHUT1                                                                                                                                                                                                                                                                                                                                                                              |
| YHG020  | YHG013, ΔYEA4                                                                                                                                                                                                                                                                                                                                                                              |

|        |                                                                                                                         |
|--------|-------------------------------------------------------------------------------------------------------------------------|
| YHG021 | YHG013, $\Delta$ HUT1, <i>YARCdelta8::P<sub>TEF1</sub>-PGM1-T<sub>ADHI</sub>-P<sub>TPII</sub>-UGPI-T<sub>CPSI</sub></i> |
| YHG022 | YHG021, <i>YCRWdelta12::P<sub>TEF1</sub>-SIR2-T<sub>ADHI</sub></i>                                                      |
| YHG023 | YHG021, <i>YCRWdelta12::P<sub>TEF1</sub>-MSN2-T<sub>ADHI</sub></i>                                                      |
| YHG024 | YHG021, <i>YCRWdelta12::P<sub>TEF1</sub>-MSN4-T<sub>ADHI</sub></i>                                                      |
| YHG025 | YHG021, <i>YCRWdelta12::P<sub>TEF1</sub>-RIM15-T<sub>ADHI</sub></i>                                                     |
| YHG026 | YHG021, <i>YCRWdelta12::P<sub>TEF1</sub>-VHb-T<sub>ADHI</sub></i>                                                       |

---

**Table S3 Comparison of different approaches in green chemistry and sustainability.**

| <b>Methods</b>      | <b>Raw material</b>    | <b>Price of raw material<br/>(USD/ton)</b> | <b>Yield<br/>(mg/g)</b> | <b>E-Factor*</b> | <b>%PE EAE*</b> | <b>Reference</b> |
|---------------------|------------------------|--------------------------------------------|-------------------------|------------------|-----------------|------------------|
| Chemical synthesis  | Phloroglucinol         | 5300                                       | 5.10                    | 20676            | 0.51%           | 1                |
| Plant extraction    | <i>Viscum album</i> L. | n.d.                                       | 0.01                    | 130102           | n.d.            | 2                |
| Microbial synthesis | Glucose                | 240                                        | 13.1                    | 1667             | 1.31%           | This study       |

\* All data were evaluated according to the 12 principles of Green Chemistry.<sup>3</sup>

## References

1. M. Kang, Z. Ma, B. Liu, D. Pan and J. Li, *Chin. J. Org. Chem.*, 2017, **37**, 1516-1522.
2. T. Fukunaga, I. Kajikawa, K. Nishiya, Y. Watanabe, K. Takeya and H. Itokawa, *Chem. Pharm. Bull.*, 1987, **35**, 3292-3297.
3. H. C. Erythropel, J. B. Zimmerman, T. M. de Winter, L. Petitjean, F. Melnikov, C. H. Lam, A. W. Lounsbury, K. E. Mellor, N. Z. Janković, Q. Tu, L. N. Pincus, M. M. Falinski, W. Shi, P. Coish, D. L. Plata and P. T. Anastas, *Green Chem.*, 2018, **20**, 1929-1961.
